# Supplementary material for: Promotion effect of Fe in mordenite zeolite on carbonylation of dimethyl ether to methyl acetate
Source: Royal Society of Chemistry journal article supplement (doi:10.1039/c4cy01580k), 2015-01-01
Supplement: c4cy01580k1.pdf [file c4cy01580k1.pdf]

## Supplementary Information

### Promotion Effect of Fe in Mordenite Zeolite on Carbonylation of Dimethyl Ether to Methyl Acetate

Hui Zhou<sup>a,b,c</sup>, Wenliang Zhu<sup>a,b</sup>, Lei Shi<sup>a,b</sup>, Hongchao Liu<sup>a,b</sup>, Shiping Liu<sup>a,b,c</sup>,  
Shutao Xu<sup>a,b</sup>, Youming Ni<sup>a,b</sup>, Yong Liu<sup>a,b</sup>, Lina, Li<sup>a,b,c</sup>, Zhongmin Liu<sup>a,b</sup>

<sup>a</sup>National Engineering Laboratory for Methanol to Olefins, Dalian Institute of Chemical Physics, Chinese Academy of Sciences, P. O. Box 110, 116023 Dalian, PR China

<sup>b</sup>Dalian National Laboratory for Clean Energy, Dalian Institute of Chemical Physics, Chinese Academy of Sciences, Dalian, PR China

<sup>c</sup>Graduate University of Chinese Academy of Sciences, Beijing 100049, PR China

\*E-mail addresses: liuzm@dicp.ac.cn (Z. Liu)

Fig.S1. XRD peaks of hkl (150) for FeHMOR samples

Fig.S2. IR spectra in the framework vibration region of FeHMOR samples

Fig.S3. UV-Vis spectra of FeNaMOR samples

Fig.S4. Difference spectra of the UV-Vis reflectance spectra between HMOR and NaMOR with various Fe content

Fig.S5. N<sub>2</sub> adsorption isotherms of FeHMOR samples

Fig.S6. GC-MS chromatograms of the organic materials retained in FeHMOR catalysts after DME conversion for 12h.

Fig.S7. Structure of mordenite unit-cell viewed down the c-axis

Fig.S8. <sup>31</sup>P MAS NMR spectra of TMPO-adsorbed FeHMOR samples

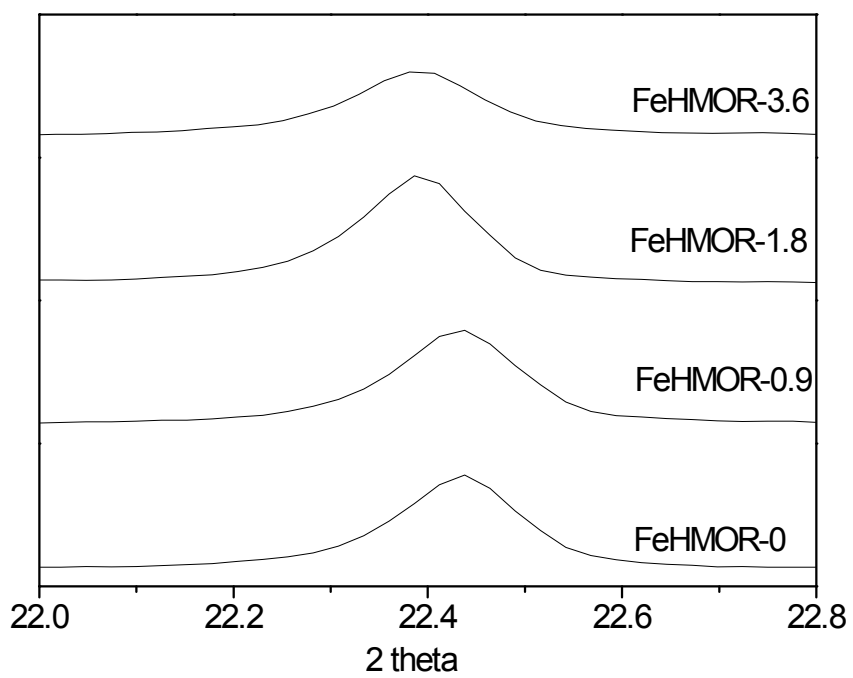

Fig.S1. XRD peaks of hkl (150) for FeHMOR samples

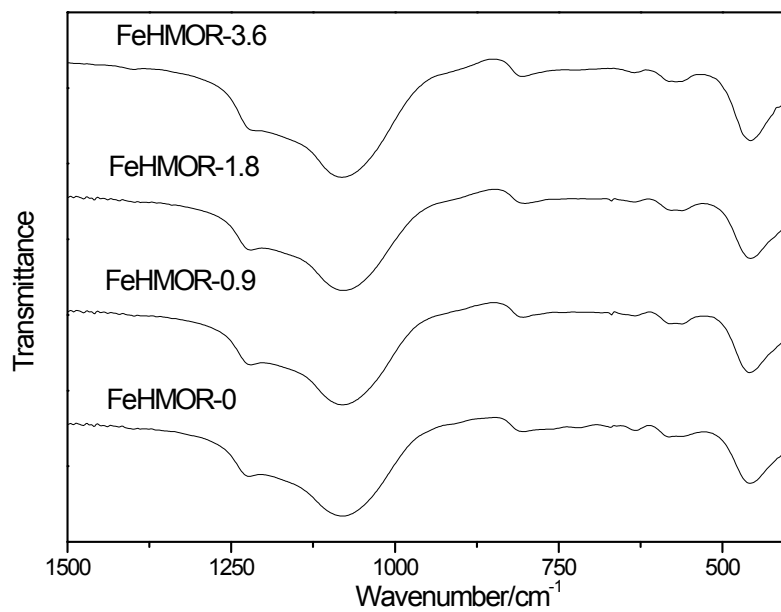

Fig. S2. IR spectra in the framework vibration region of FeHMOR samples

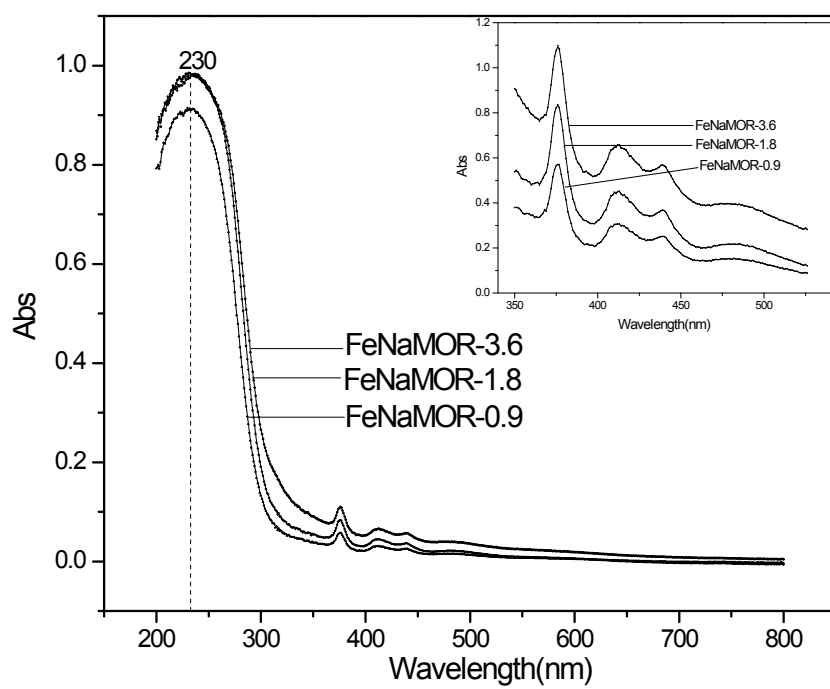

Fig.S3. UV-Vis spectra of FeNaMOR samples

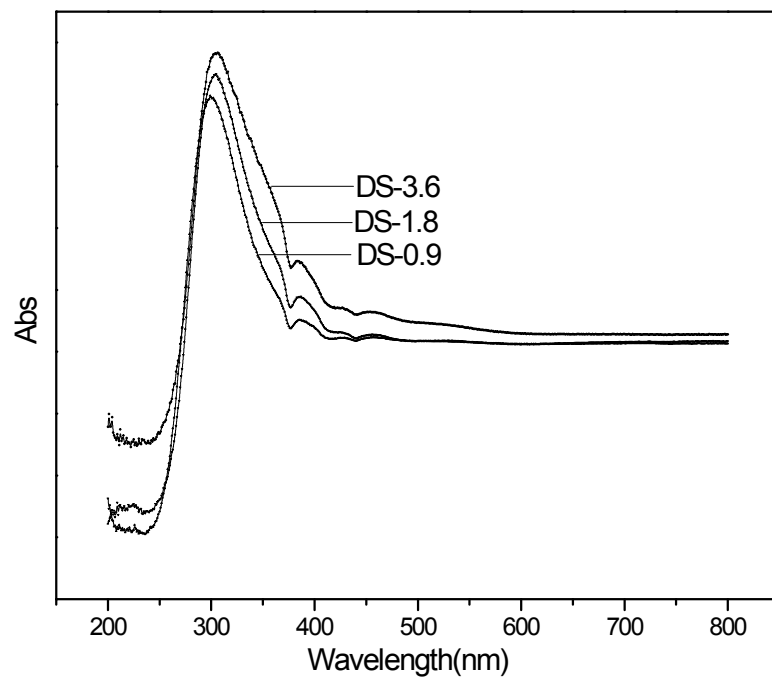

Fig. S4. Difference spectra of the UV-Vis reflectance spectra between HMOR and NaMOR with various Fe content

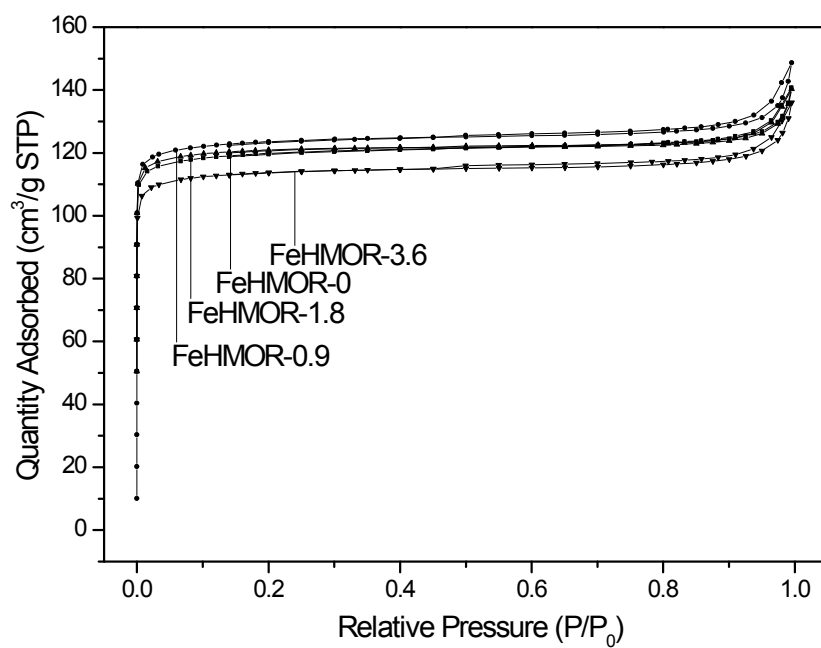

Fig.S5. N<sub>2</sub> adsorption isotherms of FeHMOR samples

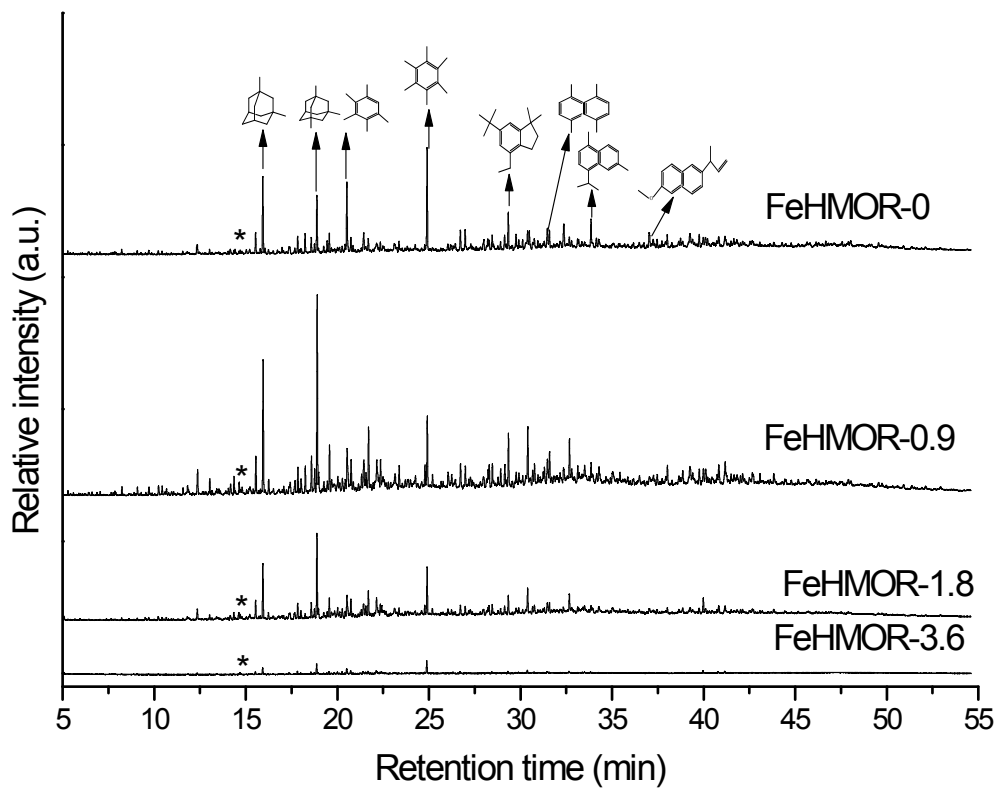

Fig.S6. GC-MS chromatograms of the organic materials retained in FeHMOR catalysts after DME conversion for 12h.



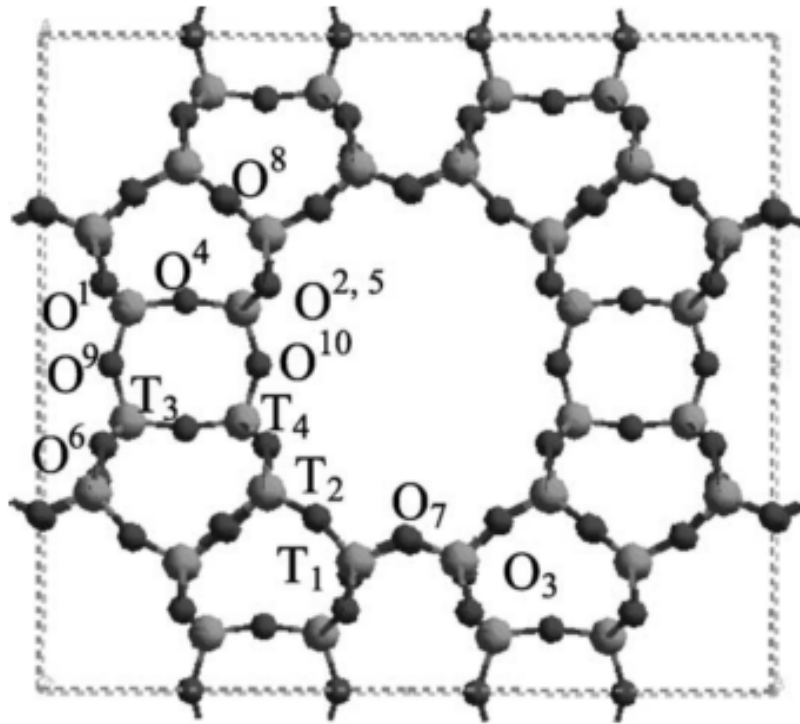

Fig.S7. Structure of mordenite unit-cell viewed down the c-axis

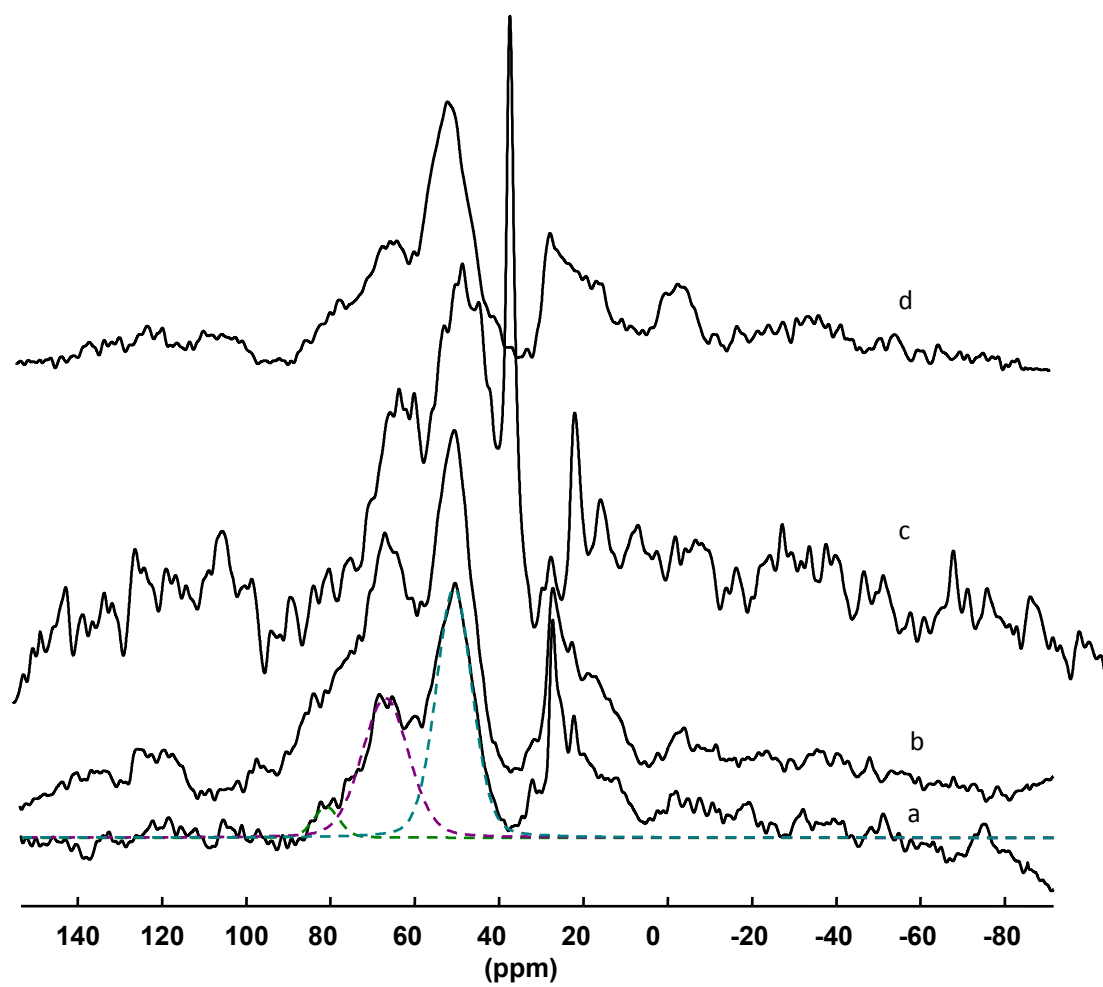

Fig.S8.  $^{31}\text{P}$  MAS NMR spectra of TMPO-adsorbed FeHMOR samples  
a: FeHMOR-0; b: FeHMOR-0.9; c: FeHMOR-1.8; d: FeHMOR-3.6;
